# Supplementary material
Source: publisher site journal article supplement (https://www.spandidos-publications.com/6706/downloadSupplementary)
Supplement: Supplementary file 1 [file downloadSupplementary]

Table SI. Primer Sequences in reverse transcription-quantitative PCR.

| Gene name     | Primer sequence(5'-3')                                   |
|---------------|----------------------------------------------------------|
| Mouse-GAPDH   | F: GGTTGTCTCCTGCGACTTCA<br>R: TGGTCCAGGGTTTCTTACTCC      |
| Mouse-IL-6    | F: AACCACGGCCTTCCCTACTT<br>R: TCTGCAAGTGCATCATCGTTGT     |
| Mouse-CXCL2   | F: ACTGAACAAAGGCAAGGCTAACT<br>R: ACATAACAACATCTGGGCAATGG |
| Mouse-HMOX1   | F: CCAGACACCGCTCCTCCAGT<br>R: CCAGGCAAGATTCTCCCTTACAG    |
| Mouse-SLC7A5  | F: TGGAGTGTGGCATTGGCTTC<br>R: AGAGCACCGTCACAGAGAAGAT     |
| Mouse-TNFAIP3 | F: GCTACGACACTCGGAACTGG<br>R: TGGGTCTTCTGAGGATGTTGC      |
| Mouse-GPX4    | F: AGGAGCCAGGAAGTAATCAAGAA<br>R: GCTAGAGATAGCACGGCAGGT   |

F, forward; R, reverse.
